# Supplementary material
Source: PubMed Central journal article supplement (PMC6646149)
Supplement: ao8b00974_si_001.pdf [file ao8b00974_si_001.pdf]

## Analysis and Isolation of Potential Artemisinin Precursors from Waste Streams of *Artemisia Annuua* Extraction

Rodger W. Stringham\*, Gary L. Moore, David S. Teager and Tai-Yuen Yue  
Process Chemistry Team, Clinton Health Access Initiative, 800 N. Five Points Rd, West Chester,  
PA 19380 United States

\*Rodger W. Stringham; email: [rstringham@clintonhealthaccess.org](mailto:rstringham@clintonhealthaccess.org); phone 1-302-397-1049

### SUPPLEMENTAL INFORMATION

Includes  $^{13}\text{C}$  NMR spectroscopic data for identified impurities  
Includes HPLC chromatograms of partition samples  
Includes HPLC assay results for partition samples

$^{13}\text{C}$  NMR spectroscopic data  
For component eluting at GC-MS RT=5.46 min

### Scheme S1

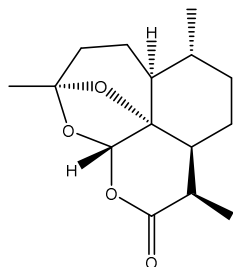

Deoxyartemisinin (**5**)

### Table S1

| assignment | Peak (ppm); this work | Peak (ppm); ref. 20 deoxyartemisinin |
|------------|-----------------------|--------------------------------------|
| C-12       | Nd                    | 173.5                                |
| C-4        | 109.2                 | 109.2                                |
| C-5        | 99.7                  | 99.7                                 |
| C-6        | 82.5                  | 82.4                                 |
| C-1        | 44.7                  | 44.6                                 |
| C-7        | 42.5                  | 42.4                                 |
| C-10       | 35.4                  | 35.4                                 |
| C-3        | 34.0                  | 33.9                                 |
| C-9        | 33.5                  | 33.5                                 |
| C-11       | 32.8                  | 32.8                                 |
| C-15       | 24.0                  | 24.0                                 |
| C-8        | 23.6                  | 23.5                                 |
| C-2        | 22.1                  | 22.0                                 |
| C-14       | 18.6                  | 18.6                                 |
| C-13       | 12.7                  | 12.6                                 |

For component eluting at GC-MS RT=4.09 min

Scheme S2

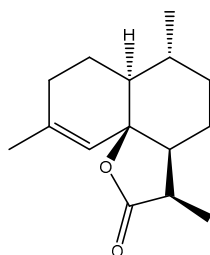

Dihydro-*epi*-deoxy-  
arteannuin B (**4**)

Table S2

| assignment | Peak (ppm); this work | Peak (ppm); ref. 20 dihydro- <i>epi</i> -deoxy-arteannuin B | Peak (ppm); ref. 20 dihydro-deoxy-arteannuin B |
|------------|-----------------------|-------------------------------------------------------------|------------------------------------------------|
| C-12       | 179.3                 | 179.4                                                       | 180.6                                          |
| C-4        | 142.1                 | 142.2                                                       | 142.3                                          |
| C-5        | 121.8                 | 121.8                                                       | 120.5                                          |
| C-6        | 83.1                  | 83.2                                                        | 86.7                                           |
| C-1        | 46.6                  | 46.6                                                        | 46.6                                           |
| C-7        | 42.8                  | 42.8                                                        | 49.8                                           |
| C-11       | 39.6                  | 39.7                                                        | 39.0                                           |
| C-9        | 32.5                  | 32.5                                                        | 35.3                                           |
| C-3        | 30.9                  | 30.8                                                        | 26.0                                           |
| C-10       | 29.7                  | 29.7                                                        | 30.7                                           |
| C-15       | 23.8                  | 23.5                                                        | 24.1                                           |
| C-8        | 23.4                  | 23.4                                                        | 22.0                                           |
| C-2        | 21.0                  | 21.0                                                        | 20.1                                           |
| C-14       | 19.6                  | 19.6                                                        | 19.9                                           |
| C-13       | 9.4                   | 9.5                                                         | 13.1                                           |

## HPLC Chromatograms

Overlay of chromatograms of the methanol extract (green) of the Guilin waste, the first heptane phase (red) and the final heptane phase (blue). Injection volumes were normalized to DHAA content to enable visual comparison of the enrichment obtained. Note that the response factor for AA is 2.5X that of DHAA so that its actual level is lower than it would appear. Similar chromatograms were observed for other waste materials

Figure S1. Overlay of Chromatograms from Guilin Extraction

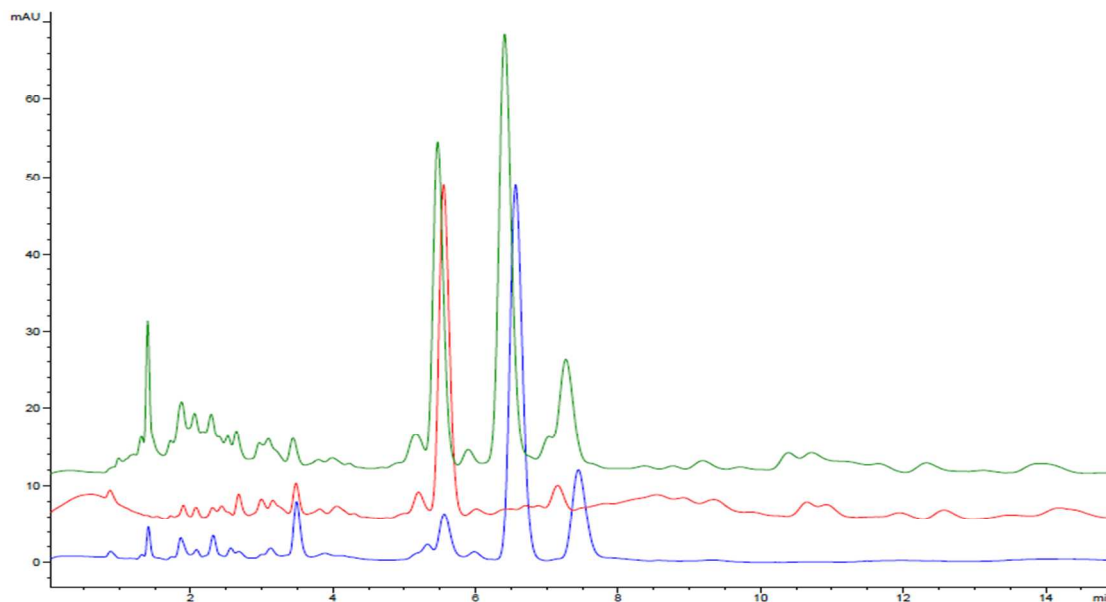

Figure S2. DHAA crystallized from cold acetonitrile

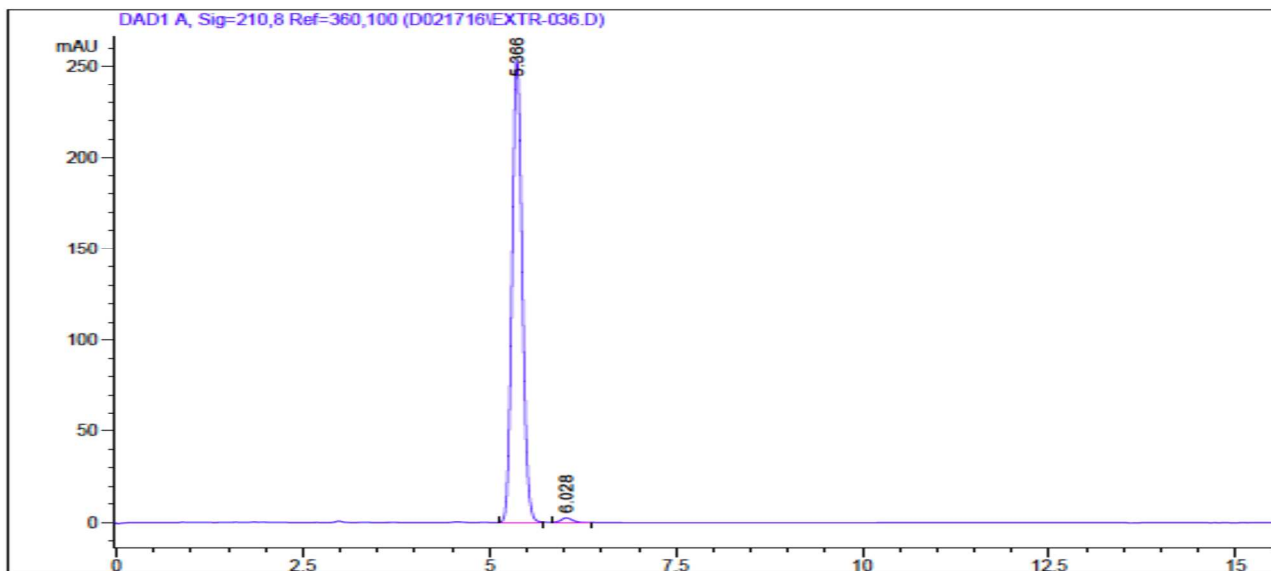

## Results of HPLC Assay of Extraction Samples

### Guilin Waste – Table S3

5.36 g waste containing 8.0% DHAA and 0.88% AA

Theoretical DHAA = 429 mg

Theoretical AA = 47 mg

| Sample     | DHAA   | % theory | AA    | % theory |
|------------|--------|----------|-------|----------|
| Extract -1 | 430 mg | 100%     | 49 mg | 104%     |
| Heptane-2  | 354 mg | 83%      | 42 mg | 89%      |
| Aqueous-2  | 44 mg  | 10%      | 6 mg  | 13%      |
| Heptane-3  | 49 mg  | 11%      | 9 mg  | 19%      |
| Aqueous-3  | 7 mg   | 2%       | 3 mg  | 8%       |
| Final oil  | 448 mg | 104%     | 49 mg | 104%     |

### Botanical Extracts – Table S4

5.12 g waste containing 5.0% DHAA and 0.9% AA

Theoretical DHAA = 256 mg

Theoretical AA = 46 mg

| Sample     | DHAA   | % theory | AA    | % theory |
|------------|--------|----------|-------|----------|
| Extract -1 | 248 mg | 98%      | 46 mg | 100%     |
| Heptane-2  | 208 mg | 83%      | 42 mg | 91%      |
| Aqueous-2  | 17 mg  | 7%       | 4 mg  | 9%       |
| Heptane-3  | 23 mg  | 9%       | 5 mg  | 11%      |
| Aqueous-3  | 0 mg   | 0%       | 0 mg  | 0%       |
| Final oil  | 243 mg | 96%      | 50 mg | 109%     |

### Bionexx Extracts – Table S5

7.57g waste containing 6.4% DHAA and 1.4% AA (not quantified)

Theoretical DHAA = 484 mg

| Sample     | DHAA   | % theory |
|------------|--------|----------|
| Extract -1 | 381 mg | 79%      |
| Aqueous-1  | 345 mg | 72%      |
| Final oil  | 376 mg | 78%      |

### Sample explanation

Extract -1 = methanol extract after cooling and filtration

Aqueous-1= aqueous layer after first heptane partition and pH adjustment

Heptane-2 = heptane layer after pH adjustment showing partition of acids from aqueous

Aqueous-2 = aqueous layer after pH adjustment and partition of acids into heptane

Heptane-3 = second heptane extraction of Aqueous-2

Aqueous-3 = aqueous layer after second heptane extraction of Aqueous-2  
Final Oil= combined heptane fractions of partitioned acids
